# Supplementary material
Source: publisher site journal article supplement (https://www.spandidos-publications.com/3998/downloadSupplementary)
Supplement: Supplementary file 1 [file downloadSupplementary]

## Sheet: Sup Table2
Table SIII. Differentially expressed genes in patient and control groups.
ID	adj.P.Val	P.Value	t	B	logFC	Gene.symbol	Gene.title	GSM1167073	GSM1167074	GSM1167075	GSM1167076	GSM1167077	GSM1167079	GSM1167080	GSM1167082	GSM1167083	GSM1167084	GSM1167085	GSM1167086	GSM1167087	GSM1167089	GSM1167090	GSM1167091	GSM1167092	GSM1167093	GSM1167094	GSM1167095	GSM1167096	GSM1167098	GSM1167099	GSM1167100	GSM1167101	GSM1167102	GSM1167103	GSM1167104	GSM1167105	GSM1167106	GSM1167107	GSM1167108	GSM1167109	GSM1167110	GSM1167111	GSM1167112	GSM1167113	GSM1167114	GSM1167115	GSM1167116	GSM1167117	GSM1167118
213350_at	0.00272	9.95e-08	-6.2331	7.18951	-0.692371	RPS11	ribosomal protein S11	9.94394	10.4118	9.82397	9.83839	9.94872	9.52716	10.4129	10.0192	9.76288	10.252	9.7088	10.214	10.4883	10.1415	10.2605	10.4905	10.2116	9.26043	10.0503	10.2055	10.2346	10.0922	10.2131	9.99422	8.96509	9.59187	9.58967	9.99488	9.64549	9.86895	8.98442	9.61613	9.25974	8.79618	9.89314	8.83831	8.94947	8.71861	8.99962	8.70215	9.19605	9.32953
237444_at	0.009	2.03e-06	-5.38093	4.58827	-0.640031	KIF13A	kinesin family member 13A	4.57406	6.23446	5.16621	5.55977	5.4211	4.73447	5.41922	5.64863	5.58782	5.41921	5.92048	5.36044	5.23227	5.89484	5.29661	5.68386	5.32258	5.96222	5.13252	5.10107	5.32224	5.86672	4.46397	5.3167	5.71709	5.25313	5.11124	4.54942	5.53111	4.14919	4.85825	4.85192	4.74072	4.81562	4.83589	4.50174	4.82756	4.53465	5.11072	4.58555	4.26354	4.28007
214470_at	0.009	2.2e-06	5.35776	4.51814	0.790894	KLRB1	killer cell lectin like receptor B1	9.97601	9.3475	9.03978	9.22854	10.1318	10.8353	10.1381	9.57348	9.86287	10.1697	9.84165	10.8838	10.4915	9.98212	10.7063	9.86899	9.65318	9.66313	11.3332	9.08872	9.94989	9.38872	10.48	9.98993	9.72945	10.5589	11.2813	10.1082	10.7231	10.9559	10.8453	10.4018	11.5933	11.1159	11.5628	10.8599	11.1327	10.3328	11.2088	10.2543	10.3707	10.8923
230742_at	0.02612	1.66e-05	4.77208	2.76798	0.587657	RBM5	RNA binding motif protein 5	6.58071	7.36	5.95562	7.19855	7.25457	7.48767	5.67268	6.79714	7.15632	6.64797	7.33374	6.05915	7.21719	7.2025	6.58959	6.71344	6.96558	7.75745	7.01319	7.17327	7.06256	6.71624	6.38587	7.19109	7.53845	7.7531	7.93072	6.95898	7.976	7.2835	7.95816	7.39686	7.88587	7.39539	7.71674	7.7518	7.57901	7.41077	7.93711	7.4161	7.33863	6.92694
220646_s_at	0.03385	2.72e-05	4.626	2.34003	0.781164	KLRF1	killer cell lectin like receptor F1	10.8961	9.45529	7.93446	9.48726	9.26234	9.84389	9.56388	9.40397	8.46504	9.583	9.46949	9.94115	10.068	9.25962	10.1399	9.72155	8.88152	9.55315	10.6842	9.19181	9.92647	8.93814	9.81754	9.28209	9.10808	10.4278	10.1557	9.07563	10.4489	9.98539	10.4599	10.5536	11.0733	10.0801	10.6939	10.2696	10.9714	10.2279	10.9773	10.1794	9.21559	10.7816
242918_at	0.04586	4.78e-05	4.45711	1.85071	0.652093	NASP	nuclear autoantigenic sperm protein	5.91129	6.21488	5.20776	5.69781	6.40336	6.33177	5.09142	6.03576	6.18083	5.22555	5.96355	5.16282	5.49494	6.02455	5.1503	5.78304	5.52295	6.45546	5.62604	5.80753	5.1916	5.24163	5.84257	5.80943	6.92931	6.27505	7.19427	5.55619	6.7857	6.00155	7.26812	6.01366	7.56659	5.92045	7.06154	6.82698	6.61728	6.26841	6.52142	6.20512	6.27875	5.68589
210164_at	0.04586	5.03e-05	4.4418	1.80668	0.674469	GZMB	granzyme B	10.1917	9.59532	9.08784	9.55374	9.70614	9.76325	9.49624	9.55353	8.15291	9.09735	9.38211	9.47411	10.0459	9.27054	10.3309	9.79439	8.91071	9.62473	10.7077	9.3508	9.60756	8.09167	9.85115	9.5322	9.25039	10.2372	10.2917	8.67967	9.9256	10.0268	11.0162	10.0208	10.1212	10.6701	10.541	9.89921	10.7402	10.2285	10.5563	10.0137	9.91743	10.6088
244313_at	0.05088	6.51e-05	-4.36379	1.58317	-0.748224	CR1	complement component 3b/4b receptor 1 (Knops blood group)	9.57697	9.89685	10.6617	11.6118	9.34655	8.85091	9.35221	9.40077	10.1931	9.60042	9.88368	9.31947	9.09093	10.7068	9.84752	9.71507	9.51486	10.0834	9.652	9.62011	10.1628	10.0343	9.00362	9.93319	10.5088	9.60432	8.9355	8.55552	9.52542	9.17492	8.89201	8.88926	9.08845	9.3797	8.29525	9.32731	8.88341	8.6329	9.0848	8.99515	9.12477	8.27484
230585_at	0.06261	0.000111	-4.20071	1.12088	-0.759986	KCNJ15	potassium voltage-gated channel subfamily J member 15	6.95541	7.75804	7.72837	8.77774	7.70606	6.56167	7.78751	7.98942	8.23045	7.90084	7.88125	7.2924	6.8269	8.7258	8.19781	7.73932	7.16312	8.10164	7.69148	6.65212	8.11126	7.86326	7.79869	7.54562	8.57449	6.68742	7.01783	6.80787	7.01733	7.70336	7.15685	7.3497	6.76072	7.08796	6.20116	7.70901	7.24345	5.95908	7.68481	6.58144	6.45305	6.71974
210606_x_at	0.07318	0.000179	4.05219	0.70633	0.639649	KLRD1	killer cell lectin like receptor D1	9.36737	8.74347	7.89153	9.38994	9.46291	9.63594	8.46555	8.65561	7.66584	8.50087	8.88312	8.58903	9.24259	8.28248	9.58977	8.72644	8.40197	8.357	9.8478	8.89983	9.00137	7.5699	9.20637	8.14076	9.06296	8.7541	10.0587	8.2877	9.46475	9.24789	10.1803	9.50913	10.0629	9.7746	9.41329	10.0722	9.52851	9.06247	9.27843	9.23645	9.04197	9.77454
205863_at	0.0817	0.000234	-3.96831	0.47513	-0.85575	S100A12	S100 calcium binding protein A12	11.0653	12.4072	13.3641	13.8168	11.1218	11.1512	11.0603	11.887	12.5562	11.89	12.2989	12.0194	12.0024	12.9635	11.5737	10.845	11.71	12.0649	11.5253	11.4289	10.9537	12.5629	9.9697	12.1854	12.0655	11.3074	10.9925	10.2381	11.7677	10.7701	10.3136	11.7743	10.7422	11.1514	9.39813	11.3248	10.7595	10.6117	10.5548	11.1597	10.9147	10.789
215894_at	0.08298	0.000288	3.90279	0.2961	0.691199	PTGDR	prostaglandin D2 receptor	7.96865	7.43176	5.75579	7.54312	8.257	8.13685	6.82583	7.09555	6.59057	6.45989	7.15882	6.50582	7.59071	6.85006	7.98207	6.93195	6.97889	7.31276	8.06243	7.20057	7.92874	6.06057	7.78537	7.3365	7.5977	7.73158	8.64153	6.41598	8.39318	7.2226	8.81049	7.54539	8.51428	7.91887	8.60501	8.38889	8.05179	7.99124	8.20516	8.07465	7.71274	8.43545
209160_at	0.08777	0.000327	3.86233	0.18626	0.67669	AKR1C3	aldo-keto reductase family 1, member C3	7.58827	6.99844	5.94781	6.60382	6.17849	6.31809	6.73523	6.76124	6.56409	6.80659	7.10436	7.38087	7.14011	6.67684	7.60241	6.81683	5.39199	6.55397	7.70206	6.42847	6.83911	5.8608	6.89267	7.2571	5.6242	7.61703	7.09611	5.68062	7.75702	7.10619	7.81418	7.53369	8.20175	7.90248	7.8053	6.44889	7.86969	7.56447	8.30335	7.26054	6.51094	7.66692
202912_at	0.10677	0.000558	-3.69056	-0.27366	-0.803768	ADM	adrenomedullin	8.025	9.01358	9.61015	9.94957	8.98545	7.80114	8.29449	8.29473	9.90671	8.66429	8.75383	8.31051	7.33965	9.72104	9.0801	8.9027	7.70444	8.89142	8.78323	6.83848	8.72546	8.27965	7.96478	8.0623	9.07037	8.11955	8.23915	7.11677	8.45147	7.39316	8.26415	8.49011	7.98128	8.14833	6.51765	8.65653	8.15843	6.81512	8.33436	7.40053	7.10686	6.85894
203021_at	0.11035	0.000676	-3.6282	-0.43795	-0.714592	SLPI	secretory leukocyte peptidase inhibitor	7.80505	9.1832	9.09665	8.88178	9.08541	7.16557	8.25292	7.671	10.249	8.51185	8.36855	8.08187	6.62252	8.68954	8.86836	7.55111	8.25896	8.55452	7.60211	6.73322	7.04958	8.32564	8.5703	8.31146	8.56236	7.82976	7.58777	7.17758	7.8776	7.39294	7.36791	7.15321	8.32039	7.49531	6.37597	7.85348	7.74715	7.50394	7.52859	7.50441	6.46807	7.63551
235885_at	0.11035	0.000694	3.61944	-0.46091	0.675462	P2RY12	purinergic receptor P2Y12	7.07504	6.81684	6.82414	8.20442	6.7294	5.53433	7.09165	8.65843	6.32009	7.38621	7.5902	7.39431	8.00578	8.08535	7.68707	7.40628	7.45625	6.35869	7.25946	7.22154	8.24442	8.33491	7.1861	6.08011	6.32831	8.26934	7.49709	7.67128	8.46339	7.20968	7.71458	7.95008	7.65623	7.19425	9.05938	7.83306	7.50379	8.37359	7.2783	7.66047	8.53096	7.63129
213906_at	0.11204	0.000729	3.60328	-0.50319	0.630213	MYBL1	MYB proto-oncogene like 1	9.3805	8.94642	7.62377	8.1458	9.73106	9.82366	8.54497	8.11299	8.03033	7.99265	8.58823	8.15192	8.57849	7.9292	9.33643	8.47589	8.76189	8.42267	9.61527	9.28037	9.26234	8.00594	8.99112	8.41274	9.16641	9.5156	9.94157	7.85804	9.37552	8.83529	10.2524	8.63236	9.41246	9.70693	9.74081	9.85084	9.63278	9.51232	10.0289	9.08334	9.13634	9.85365
226817_at	0.113	0.000756	-3.5913	-0.53445	-0.750981	DSC2	desmocollin 2	7.5772	8.57244	7.7905	9.54426	7.3896	7.16332	7.33323	7.38768	8.6887	8.02954	7.43801	7.72197	6.94992	8.561	7.35472	6.56212	7.12966	8.39804	7.37859	6.4956	6.70788	8.18668	6.64457	7.18124	8.39086	7.4977	7.53745	6.72029	7.62862	6.15208	6.56182	5.96641	7.49734	6.91567	5.56027	7.64191	6.891	7.04742	6.30986	6.35886	6.47807	6.71991
216191_s_at	0.11562	0.000794	3.5752	-0.57641	0.695792	TRDV3	T cell receptor delta variable 3	8.8926	8.97684	8.0428	6.5306	8.51616	9.39573	8.52034	8.71629	7.4845	8.16347	8.14259	8.42169	8.64112	7.57865	8.50172	8.19983	7.68004	8.38365	8.66618	8.35807	8.44742	6.90503	8.55263	8.35736	8.88866	8.25758	9.01398	7.93135	9.26146	9.87943	8.78615	9.16794	9.61009	11.2017	8.29276	9.64081	9.5123	8.65048	9.16868	8.1552	8.2247	9.20483
204731_at	0.11562	0.000795	3.57487	-0.57726	0.60079	TGFBR3	transforming growth factor beta receptor 3	8.35588	8.22669	7.37867	8.40326	9.37345	9.07023	7.99107	7.74594	7.59552	7.55917	8.31513	7.90551	7.88091	7.74851	8.78714	8.40975	8.0977	7.90639	9.23279	8.3216	8.54125	6.98506	8.3523	8.00314	8.3657	8.63541	9.68381	7.53768	8.94376	8.35109	10.0373	8.1682	8.81443	9.35594	9.34684	9.7764	9.09087	8.47418	8.97684	8.72633	8.53025	9.03519
1553177_at	0.12611	0.00104	3.48491	-0.80968	0.616779	SH2D1B	SH2 domain containing 1B	9.15098	7.85225	6.93176	7.41855	6.74522	7.58775	8.32092	8.07025	6.64147	8.09445	8.38598	8.03372	8.24037	7.70734	8.24446	8.4842	7.1512	8.25858	8.87438	7.8268	8.39688	7.51625	8.41364	7.93479	6.95484	8.72731	7.92261	7.61545	8.88595	8.47396	7.86412	8.95225	9.08912	8.0943	8.25377	7.50282	9.38535	8.8037	9.3834	8.53049	7.81374	9.01731
213348_at	0.12656	0.00105	3.48223	-0.81656	0.679018	CDKN1C	cyclin dependent kinase inhibitor 1C	8.24334	8.47051	9.35929	7.2691	6.05664	7.20391	7.23143	8.67084	6.7488	7.39824	9.29914	8.50543	7.88337	8.31343	8.37685	7.60696	8.3843	8.07966	8.76359	8.37556	8.45448	7.95791	7.57522	7.63862	7.72285	8.5933	9.15221	8.51898	8.88917	7.8429	9.11083	8.1718	8.1812	9.24327	9.03445	8.65772	8.50615	9.17264	9.13185	9.62336	8.56028	8.45993
232914_s_at	0.12909	0.00109	3.46976	-0.84848	0.62086	SYTL2	synaptotagmin like 2	8.41816	7.82092	6.88545	7.31265	9.19556	9.14174	7.59037	7.3989	7.93076	6.93058	7.85114	7.09569	7.50087	7.183	8.27527	7.85469	7.71908	7.67223	8.8144	7.50362	8.12707	6.81051	7.69884	7.89917	8.22279	8.45429	9.47462	7.06618	8.07151	7.88015	9.13205	8.01777	8.60669	9.25717	9.22486	9.02893	8.84553	8.44747	8.93651	7.96342	8.12531	8.78841
206343_s_at	0.13054	0.00112	-3.46033	-0.87259	-0.682042	NRG1	neuregulin 1	6.94924	8.12252	8.23556	6.69369	8.02988	7.22543	7.2915	6.91356	7.4845	6.43326	6.63629	5.95054	7.54265	8.21325	7.27052	6.86602	8.2221	7.17078	7.56391	7.07278	6.28588	8.61551	5.33841	8.18955	7.09832	6.36245	6.93668	6.58196	7.30869	5.63205	5.71244	5.44358	6.21661	6.09665	6.37598	6.05094	6.68477	6.32969	7.34151	7.01009	6.97448	7.50283
209369_at	0.13423	0.00123	-3.42933	-0.9516	-0.948735	ANXA3	annexin A3	7.69716	8.58694	9.05303	11.6073	8.16815	7.14527	7.99772	7.94615	9.70622	8.37694	8.69495	8.26107	9.42946	9.14385	9.05431	8.74957	7.76708	8.62479	7.92928	6.43747	8.87145	8.33191	7.24969	7.4311	8.63993	7.69416	7.68585	6.85149	7.83994	6.90963	7.37233	7.56128	6.85619	7.56691	7.15267	7.83963	7.792	6.70989	7.28868	6.77396	7.34645	6.51652
217143_s_at	0.13587	0.00127	3.41936	-0.97691	0.607828	YME1L1	YME1 like 1 ATPase	9.82555	9.70617	8.97236	7.75129	9.51787	10.2199	9.51005	9.54646	8.23984	9.21613	9.03091	9.20152	9.64974	8.60874	9.41781	9.41025	8.82627	9.04539	9.58978	9.12032	9.56114	7.96477	9.42988	9.06043	9.42685	9.18983	9.71735	8.84749	9.9607	10.686	9.40421	9.97538	10.179	11.9119	9.25896	10.32	10.3591	9.45546	9.95536	9.00294	9.18385	10.134
205568_at	0.14051	0.00139	-3.38931	-1.05295	-0.610417	AQP9	aquaporin 9	10.7556	11.7487	11.6238	12.8127	10.8639	10.3599	11.0084	10.5048	11.5283	11.1847	11.3868	11.0422	10.2253	11.6916	11.2946	11.3938	10.6237	11.6183	10.8106	9.85056	10.4963	10.871	10.0345	10.8603	11.7463	10.6248	10.8188	10.1852	10.7502	10.1804	10.638	10.334	10.4443	11.0974	9.21863	10.9424	10.6836	10.1663	10.3715	10.1622	10.0606	9.91595
227250_at	0.14663	0.00155	-3.35162	-1.1478	-0.672212	KREMEN1	kringle containing transmembrane protein 1	5.72237	7.14511	7.23774	8.26144	6.81032	5.5346	7.37979	6.24224	7.75254	6.82171	7.08982	6.54606	5.94772	7.27151	6.93098	6.57411	6.11264	6.86839	7.00542	5.695	6.75595	6.29633	6.23686	6.55648	7.19396	6.32775	6.33242	5.95039	6.62552	5.75268	5.64893	5.81703	6.49681	6.05673	5.48457	7.13757	6.05841	5.21977	5.61255	5.93541	5.67271	5.65758
227803_at	0.14996	0.00163	3.33472	-1.19012	0.635081	ENPP5	ectonucleotide pyrophosphatase/phosphodiesterase 5 (putative)	4.86495	4.53071	3.50797	4.66366	5.39034	5.37337	4.33899	3.95027	4.13713	3.75332	4.74459	4.38031	4.50223	3.92871	5.7197	4.78776	4.10373	4.60882	5.91582	4.79364	5.46421	3.57412	4.57751	4.25919	4.71809	5.1174	6.08606	3.83697	5.87885	4.78692	6.22524	4.91581	6.20367	5.39951	5.99564	6.10163	4.9835	4.65289	5.61038	4.75253	4.45397	5.85234
210690_at	0.17038	0.00262	3.17024	-1.59516	0.808248	KLRC4	killer cell lectin like receptor C4	6.11036	6.25794	4.21508	6.10683	6.9481	6.32582	5.24516	4.85778	4.47121	4.48416	5.25206	5.03035	5.74303	4.66138	6.87851	5.27672	5.7165	4.47402	6.22176	6.38508	6.69628	3.92897	5.592	5.16336	5.97931	5.55952	8.04544	5.69	6.48833	6.6576	7.49299	5.01763	6.90375	6.11579	6.94179	8.26058	6.24189	5.91695	6.62811	6.32546	5.66649	6.94884
238581_at	0.18665	0.00335	3.08322	-1.80427	0.624977	GBP5	guanylate binding protein 5	8.34448	8.80226	7.49238	8.65637	8.27133	9.78121	7.88772	9.00198	9.07719	8.24265	9.22515	8.55295	8.05134	8.22449	9.86897	8.95878	7.60158	9.18592	8.42844	8.40571	8.64116	7.85013	8.99052	8.80959	9.29783	9.42419	11.2746	7.77513	8.79068	8.73949	10.3538	8.80707	9.71201	9.50266	9.61879	10.8768	9.33424	8.71065	9.33037	9.40065	8.71214	9.3417
225612_s_at	0.19036	0.00354	-3.06326	-1.8517	-0.601051	B3GNT5	UDP-GlcNAc:betaGal beta-1,3-N-acetylglucosaminyltransferase 5	7.73391	9.41172	9.05676	10.4926	8.38954	8.16977	7.30864	7.55232	9.14252	8.66388	8.54263	8.89073	7.55062	8.98596	8.19562	7.90074	8.37187	9.10909	7.93492	7.32007	8.64468	9.01501	7.297	8.51528	8.50574	8.33963	7.77954	7.69831	8.14637	7.25778	7.48402	7.87096	7.96213	7.96061	6.69183	8.48704	8.19015	7.05031	8.4625	7.40913	7.74586	7.50248
219410_at	0.19421	0.00377	3.04056	-1.90541	0.629336	TMEM45A	transmembrane protein 45A	3.86538	4.2192	4.18865	5.12169	4.56215	3.74153	4.79957	4.7538	4.57827	6.39838	5.54033	6.07016	5.30421	4.81341	4.57397	4.79717	5.09149	4.2108	4.27253	4.73556	4.88598	4.82817	4.9748	3.84842	3.53773	5.9862	4.27988	5.04078	5.6936	6.01716	4.72564	4.37083	5.67649	4.04093	7.00511	4.81268	5.35295	5.36118	4.48305	4.68763	5.58085	5.93114
223836_at	0.19976	0.00405	3.01495	-1.96568	0.589597	FGFBP2	fibroblast growth factor binding protein 2	9.91573	9.28062	7.38211	9.33559	10.0366	9.65242	9.32429	8.94128	7.61505	8.87409	9.09871	8.93617	9.39582	8.58163	9.9687	9.22711	8.09582	9.01102	10.2459	9.36408	9.16717	7.95737	9.87772	8.8883	9.0981	9.34274	10.3027	8.314	9.62805	8.91849	10.8998	9.10321	9.9496	10.1431	9.9079	10.3211	10.0505	9.15394	9.8094	9.85247	8.94389	10.2551
206785_s_at	0.20117	0.0042	3.00184	-1.9964	0.621298	KLRC1/KLRC2	killer cell lectin like receptor C1/killer cell lectin like receptor C2	7.05306	7.52833	7.24614	6.66144	7.09095	7.98597	5.95255	7.02639	5.46715	7.33534	7.78179	7.47367	8.47842	7.30582	7.32186	7.28487	5.87122	6.90132	7.37152	7.52057	7.67271	6.72125	7.76722	6.01827	6.94836	7.39882	7.6049	6.35623	8.2861	7.49201	9.12367	7.59757	8.61947	8.85881	7.35526	6.56201	8.23843	7.74734	7.58039	6.44023	6.82746	7.90959
218963_s_at	0.20117	0.00422	-3.00006	-2.00056	-0.595776	KRT23	keratin 23	7.11982	8.18479	6.4935	8.29873	6.8074	6.44008	7.61378	7.37968	7.72811	8.3819	7.48425	7.39783	6.25676	7.30114	7.66512	7.67574	7.04401	9.05185	7.29863	5.52039	7.28797	7.87698	6.59383	7.29584	8.71675	7.08887	7.03596	6.61554	7.31027	7.18178	7.11763	7.16702	7.02083	6.38474	5.98595	6.65864	6.88941	6.61878	6.75796	6.14383	6.69318	6.63173
227697_at	0.20254	0.00433	-2.99073	-2.02237	-0.693345	SOCS3	suppressor of cytokine signaling 3	7.00722	7.85159	10.1647	10.0062	7.62097	7.65047	6.78207	7.45759	8.60389	7.09839	7.63154	7.22523	6.5469	8.72388	7.73652	7.6262	7.44412	7.8082	7.77891	7.12744	8.25685	7.67601	7.07594	7.9513	7.47174	7.44793	7.41909	6.60162	7.68534	5.94908	7.46543	7.07287	7.08458	7.5115	6.8071	7.59393	7.2504	6.40607	7.76966	6.51113	7.16146	6.16743
205844_at	0.20322	0.00438	-2.98698	-2.0311	-0.727093	VNN1	vanin 1	6.8691	7.40087	9.88996	9.67628	8.04366	7.18782	7.17262	6.37378	9.19636	7.23708	8.78787	7.61364	8.03645	9.6026	8.32814	6.4921	8.32677	7.57679	8.33726	8.00506	6.6779	8.97455	7.2302	7.68324	9.27413	7.01465	7.16191	7.03047	6.95026	7.32185	7.75343	6.23523	7.4035	8.11571	7.20648	7.71417	7.41075	7.87686	7.3812	7.30714	7.30387	5.59383
1555878_at	0.20544	0.0046	2.96887	-2.07326	0.679382	RPS24	ribosomal protein S24	6.47693	7.01768	4.60455	4.08107	7.97688	6.26731	7.07086	6.89481	7.32185	5.5093	6.32554	4.98883	5.59026	6.48074	6.07541	6.35363	5.94592	6.79352	7.00355	5.70514	6.61219	7.18997	6.39343	6.51596	7.7403	6.42076	7.41294	5.39632	7.66073	7.57663	7.71459	7.12937	7.66261	5.83632	7.66223	7.6439	6.90875	7.30982	7.26416	7.15448	6.59355	6.34895
235568_at	0.23089	0.0061	-2.86559	-2.31036	-0.725104	MCEMP1	mast cell expressed membrane protein 1	8.50617	9.43426	11.8119	12.5967	9.03956	8.3063	8.54047	8.97397	10.223	8.88988	9.1194	9.88022	9.23122	10.4718	9.49375	9.25375	9.24399	9.69877	9.14559	8.90886	9.33094	9.86866	8.00754	8.89828	9.06941	8.74878	8.12173	8.13204	8.98342	8.18062	8.45866	8.73021	8.17089	8.35711	8.09952	9.14087	8.38671	8.53482	8.72707	8.4983	8.94817	8.4845
206371_at	0.23679	0.00651	-2.84168	-2.36445	-0.804296	FOLR3	folate receptor 3	7.25506	8.04312	10.1506	7.85498	7.22218	6.39641	9.02856	6.78573	6.71045	6.74313	7.28537	8.58118	6.06717	8.53753	6.89406	6.8518	6.89513	7.56799	6.93002	6.2325	6.50077	6.65747	7.16456	9.9563	8.86837	6.40297	6.44938	7.67886	6.95945	7.30938	8.181	6.16587	6.27527	6.48493	7.13117	5.52469	6.50618	6.70933	6.27365	5.64255	6.37687	6.29524
207275_s_at	0.24237	0.00705	-2.81195	-2.43123	-0.640837	ACSL1	acyl-CoA synthetase long-chain family member 1	9.33178	10.2519	9.9676	12.2425	9.29068	8.55972	9.43955	8.89481	10.2169	9.36432	9.70195	9.33402	8.96821	10.4428	9.95326	10.103	8.90929	10.3343	9.48235	8.43115	10.097	9.32039	9.02714	9.40557	9.89931	9.10035	9.23993	8.61239	9.48067	8.83928	9.16029	9.59063	8.81122	9.3901	7.77531	9.42144	9.30924	8.10713	9.32455	8.28424	8.7786	8.52871
206177_s_at	0.24454	0.00729	-2.79895	-2.46028	-0.957967	ARG1	arginase 1	7.58777	7.07962	9.0299	11.7358	6.65359	6.31408	7.40756	8.26868	8.77271	7.68992	8.59844	7.23191	6.37588	7.32584	7.44348	6.99952	5.56691	8.27895	8.81379	6.49345	8.74137	8.08086	7.50779	6.56578	6.75888	7.39857	5.4153	7.00756	6.42121	6.79787	6.82083	7.33533	6.65034	6.93375	5.333	7.05916	6.80743	6.61099	6.62177	6.4418	6.53207	6.02478
207674_at	0.24753	0.00752	-2.78731	-2.48622	-0.637485	FCAR	Fc fragment of IgA receptor	6.31377	7.06254	7.12186	9.26092	5.84252	6.075	5.85002	6.40968	7.11554	6.32693	7.10122	7.13157	6.36353	7.71414	6.86142	7.16198	6.39485	7.6164	6.23231	5.92021	7.04826	6.97332	5.64298	7.11676	7.25161	6.55035	5.95901	5.53102	5.99341	5.88074	6.29831	5.57461	6.67553	6.56206	4.94252	7.17523	6.13789	4.99545	6.96216	6.26132	5.67301	5.88206
206522_at	0.25603	0.00868	-2.73332	-2.6055	-0.629352	MGAM	maltase-glucoamylase	10.3571	11.5102	11.0446	13.1479	10.4474	9.32771	10.014	10.5619	10.919	10.7587	11.027	10.4864	9.68726	11.3248	10.4266	10.3398	10.1192	11.5729	10.7338	9.49432	10.6021	10.41	9.97787	10.6493	11.4145	10.6727	10.0883	10.0951	10.6213	10.2901	10.2986	10.4156	9.79346	10.7574	8.6614	10.1898	9.89941	9.31606	10.1123	9.57107	9.26424	8.91823
41469_at	0.25826	0.00896	-2.721	-2.63249	-0.641951	PI3	peptidase inhibitor 3	6.3806	8.81961	7.85626	5.86519	7.56806	6.73687	7.05791	6.1872	8.75385	7.44309	8.4416	7.10243	6.11183	8.1352	7.88635	5.47759	6.881	8.21519	6.22888	5.58339	5.61488	6.63194	6.58625	7.29287	7.39032	7.31907	6.35199	5.72859	7.31863	6.33493	6.8468	6.48517	7.25498	7.06305	5.5651	7.26941	6.36592	5.88726	7.01927	5.87762	5.64424	6.45633
202286_s_at	0.32929	0.0209	-2.38656	-3.33053	-0.631319	TACSTD2	tumor-associated calcium signal transducer 2	4.74843	3.70652	3.99837	6.22387	3.28778	3.33207	2.99341	3.28587	5.37787	5.30434	6.12024	4.96275	6.20734	3.42697	5.08257	3.27844	3.65904	3.25386	5.86312	3.13595	2.86942	3.54259	3.39099	3.58491	5.77953	3.13312	3.07216	3.30141	3.73502	3.64517	3.24145	3.92202	3.51991	3.25281	3.12488	4.87629	3.38223	3.32297	3.36752	4.74126	3.40889	4.83811
220532_s_at	0.33316	0.0223	-2.35954	-3.38389	-0.781385	TMEM176B	transmembrane protein 176B	7.5193	8.89076	8.05603	6.24246	5.68947	7.2746	5.07331	7.37802	7.01453	7.80393	4.85715	7.28987	7.92744	9.2979	7.6091	7.75702	5.03555	5.73426	7.63193	7.97692	7.58222	8.2271	6.036	8.63684	6.63395	6.53736	6.55201	6.50044	4.95145	5.35652	4.53904	5.01789	7.24407	6.81216	7.77935	4.77422	7.17309	6.3178	7.77495	6.296	6.88473	7.52912
203936_s_at	0.34403	0.0248	-2.31463	-3.47152	-0.69761	MMP9	matrix metallopeptidase 9	8.33164	9.13865	9.69023	12.1698	8.41997	7.73808	8.49697	9.38251	9.81027	9.28622	10.1303	8.82638	8.1739	9.76397	9.24592	9.12944	8.56343	10.7207	8.59655	8.7469	8.4678	7.98633	6.42705	9.28622	10.2188	9.67009	8.35835	8.18752	9.35158	8.77946	8.43464	8.48628	7.68641	9.29628	7.02961	8.25148	7.55418	8.3195	7.64802	8.20616	7.85635	7.1757
203290_at	0.3826	0.0356	2.16018	-3.76265	0.794577	HLA-DQA1	major histocompatibility complex, class II, DQ alpha 1	5.84041	5.7711	5.41058	6.27148	5.66478	5.53712	7.79941	5.81811	5.80462	8.22581	7.53474	5.34738	7.2437	5.71964	5.63764	9.03783	7.93819	5.56692	5.60274	5.69381	5.62658	7.98344	6.25596	8.07408	5.35307	5.39809	5.92642	8.11617	8.98095	5.79938	8.74297	5.36988	9.40869	5.76183	9.11883	5.72482	5.6889	8.91287	8.20166	8.38896	8.29462	5.80048
225207_at	0.39704	0.0406	2.10268	-3.86687	0.687333	PDK4	pyruvate dehydrogenase kinase 4	8.1078	7.94659	8.08857	8.16793	6.93316	6.87931	4.27179	7.67824	7.77948	3.98595	8.59784	8.28928	6.33897	9.08492	7.88018	7.32416	7.30791	8.47376	8.39918	8.65622	6.78636	5.86481	4.7072	6.84845	7.15521	8.34378	8.70193	7.08022	7.83881	7.51552	8.41888	7.89041	8.75798	7.96938	9.24434	8.36701	8.05893	7.07915	9.07982	8.83559	8.59673	6.09942
207815_at	0.40491	0.0437	2.07034	-3.92449	0.593121	PF4V1	platelet factor 4 variant 1	11.1092	8.50806	8.12033	10.5792	9.31162	8.0395	8.0624	10.2299	8.87094	9.14429	9.72264	10.0194	10.0267	9.41304	10.4062	10.4762	9.59162	8.30334	10.3791	10.0144	11.1641	10.8731	8.73124	9.00101	10.6039	10.4625	7.55494	9.75404	9.45499	8.22261	11.3151	11.4471	9.59417	8.67589	10.6091	9.87534	10.6886	10.3572	11.2916	10.3876	10.4187	11.3874
[truncated: 5 more columns]
